# Supplementary material for: Conventional polymer solar cells with power conversion efficiencies increased to >9% by a combination of methanol treatment and an anionic conjugated polyelectrolyte interface layer
Source: Royal Society of Chemistry journal article supplement (doi:10.1039/c4ra08904a), 2014-01-01
Supplement: c4ra08904a1.pdf [file c4ra08904a1.pdf]

**Conventional polymer solar cells with power conversion efficiencies increased to >9% by a combination of methanol treatment and an anionic conjugated polyelectrolyte interface layer**

Tao Yuan,<sup>a</sup> Dong Yang,<sup>b</sup> Xiaoguang Zhu,<sup>a</sup> Lingyu Zhou,<sup>b</sup> Jian Zhang,<sup>\*b</sup> Guoli Tu<sup>\*a</sup> and Can Li<sup>b</sup>

<sup>a</sup>Wuhan National Laboratory for Optoelectronics, Huazhong University of Science and Technology, Wuhan, 430074, People's Republic of China. E-mail: tgl@hust.edu.cn

<sup>b</sup>State Key Laboratory of Catalysis, Dalian Institute of Chemical Physics, Chinese Academy of Sciences, Dalian National Laboratory of Clean Energy, Dalian 116023, People's Republic of China. E-mail: jianzhang@dicp.ac.cn

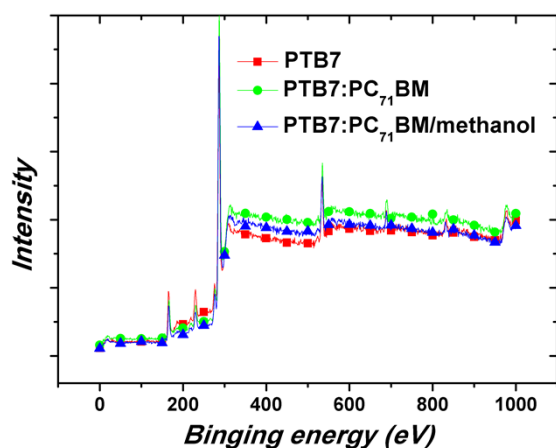

**Figure S1.** XPS survey of the top surfaces at various conditions.

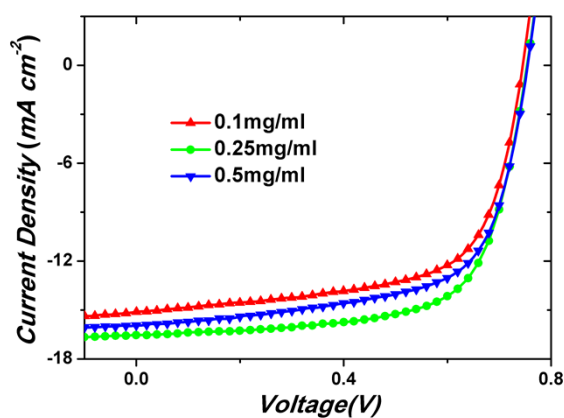

**Figure S2.** The current density-voltage ( $J$ - $V$ ) characteristics of the PSCs with  $\text{PF}_{\text{EO}}\text{SO}_3\text{Na}$  interlayer spin-coated at different solutions under AM 1.5G irradiation ( $100 \text{ mW cm}^{-2}$ ).

The  $\text{PF}_{\text{EO}}\text{SO}_3\text{Na}$  was dissolved in methanol, and the thickness of  $\text{PF}_{\text{EO}}\text{SO}_3\text{Na}$  layer was optimized by varying the concentrations of its methanol solutions from 0.1 mg/ml to 0.5 mg/ml with fixed spin-coating speed and was measured by AFM. The optimized concentration of spin-coated  $\text{PF}_{\text{EO}}\text{SO}_3\text{Na}$  interlayer was 0.25 mg/mL. The  $J_{\text{sc}}$  and  $FF$  of the resulting PSCs were highly dependent on the thickness of  $\text{PF}_{\text{EO}}\text{SO}_3\text{Na}$ . When spin-coated from 0.1 mg/mL solution, the  $\text{PF}_{\text{EO}}\text{SO}_3\text{Na}$  film could only cover a small part of the active layer, which led to a moderate enhancement. When the concentration of  $\text{PF}_{\text{EO}}\text{SO}_3\text{Na}$  was further increased to 0.5 mg/mL, the performance was reduced because the  $\text{PF}_{\text{EO}}\text{SO}_3\text{Na}$  film was too thick and acted as an insulating layer. The detailed devices characteristics with different  $[\text{PF}_{\text{EO}}\text{SO}_3\text{Na}]$  were summarized in Table S1.

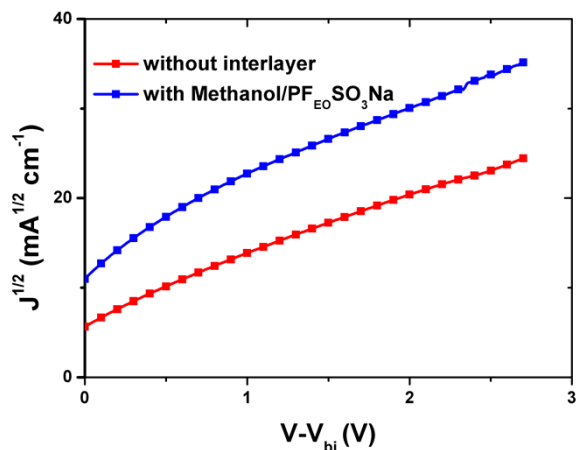

**Figure S3.** J-V curves of the hole mobility devices with methanol and PF<sub>EO</sub>SO<sub>3</sub>Na cathode interface layer or without interlayer.

To confirm the effect of methanol treatment and PF<sub>EO</sub>SO<sub>3</sub>Na layer on charge transport property, hole only devices with configuration of ITO/PEDOT:PSS/PTB7:PC<sub>71</sub>BM/MoO<sub>3</sub>/Au with or without methanol treatment and PF<sub>EO</sub>SO<sub>3</sub>Na layer were constructed and their hole mobility was calculated from the space charge limited current (SCLC) J-V curves obtained in the dark (Figure S3). SCLC can be

characterized by the Mott-Gurney square law:  $J = \frac{9}{8} \epsilon_r \epsilon_0 \mu_0 \frac{V^2}{L^3}$ , in which  $\epsilon_0$  is the vacuum permittivity,  $\epsilon_r$  is the dielectric permittivity of the active layer, L is the thickness of the active layer and  $\mu_0$  is the hole mobility. In pristine PTB7:PC<sub>71</sub>BM devices, the hole mobility was  $1.7 \times 10^{-4} \text{ cm}^2 \text{ V}^{-1} \text{ s}$ . After combination of methanol treatment and PF<sub>EO</sub>SO<sub>3</sub>Na layer, the hole mobility was increased to  $4.0 \times 10^{-4} \text{ cm}^2 \text{ V}^{-1} \text{ s}$ , which suggested that the hole transport in devices with methanol treatment and PF<sub>EO</sub>SO<sub>3</sub>Na layer was improved.

**Table S1.** Device performance of PSCs obtained with different [PF<sub>EO</sub>SO<sub>3</sub>Na].

| Cathode   | $V_{oc}$<br>[V] | $J_{sc}$<br>[mA cm <sup>-2</sup> ] | $FF$<br>[%] | PCE<br>[%] |
|-----------|-----------------|------------------------------------|-------------|------------|
| 0.1mg/mL  | 0.74            | 15.1                               | 65.8        | 7.36       |
| 0.25mg/mL | 0.74            | 16.5                               | 69.5        | 8.50       |
| 0.5mg/mL  | 0.75            | 15.9                               | 65.5        | 7.83       |
